# Supplementary material
Source: Royal Society of Chemistry journal article supplement (doi:10.1039/d6ta02686a)
Supplement: d6ta02686a1.pdf [file d6ta02686a1.pdf]

## **Supporting Information**

# **Heterostructure LDH/oxides as p-n type Electrocatalyst for the alkaline Water Splitting: An Experimental Assessment via Temperature-dependent Study**

**Hariharan N Dhandapani,<sup>†‡</sup> Kaveri Senthivel,<sup>†‡</sup> Madheshkumar R,<sup>†‡</sup> B. Ramesh Babu<sup>†‡\*</sup>  
and Subrata Kundu<sup>†‡\*</sup>**

<sup>†</sup>*Academy of Scientific and Innovative Research (AcSIR), Ghaziabad-201002, India.*

<sup>‡</sup>*Electrochemical Process Engineering (EPE) Division, CSIR-Central Electrochemical  
Research Institute (CECRI), Karaikudi-630003, Tamil Nadu, India.*

<sup>\*</sup>*E-mail: [brbabu@cecri.res.in](mailto:brbabu@cecri.res.in); [skundu.cecri@csir.res.in](mailto:skundu.cecri@csir.res.in); [kundu.subrata@gmail.com](mailto:kundu.subrata@gmail.com);*

*Phone/Fax: (+ 91) 4565-241487.*

This file contains **29** pages of the details of reagents, electrochemical results, electrochemical characterizations, and characterizations like post-HR-TEM, FE-SEM, and EDS spectra results are provided

| <b>Figures</b>  | <b>Subject of the Figure</b>                                                                                                                                                                                                                                                             | <b>Page number</b> |
|-----------------|------------------------------------------------------------------------------------------------------------------------------------------------------------------------------------------------------------------------------------------------------------------------------------------|--------------------|
| <b>Table S1</b> | Reagents and Instrumentation                                                                                                                                                                                                                                                             | <b>S3</b>          |
| <b>S1</b>       | IR spectra for Mn <sub>2</sub> O <sub>3</sub> , MnFe-LDH and MnFe-LDH/Mn <sub>2</sub> O <sub>3</sub> .                                                                                                                                                                                   | <b>S7</b>          |
| <b>S2</b>       | EDS spectrum of (a) Mn <sub>2</sub> O <sub>3</sub> (b) MnFe-LDH and (c) MnFe-LDH/Mn <sub>2</sub> O <sub>3</sub> from FE-SEM showing the presence of all the expected elements.                                                                                                           | <b>S8</b>          |
| <b>S3</b>       | (a) Colour mapping images MnFe-LDH/Mn <sub>2</sub> O <sub>3</sub> from FE-SEM, (b-d) Uniform distribution of Mn, Fe, and O elements respectively.                                                                                                                                        | <b>S9</b>          |
| <b>S4</b>       | (a) shows N <sub>2</sub> adsorption-desorption of Mn <sub>2</sub> O <sub>3</sub> , MnFe-LDH and MnFe-LDH/Mn <sub>2</sub> O <sub>3</sub> and (b-d) Pore size distribution diagram of Mn <sub>2</sub> O <sub>3</sub> , MnFe-LDH and MnFe-LDH/Mn <sub>2</sub> O <sub>3</sub> respectively.  | <b>S10</b>         |
| <b>S5</b>       | The electrochemically effective surface area for Mn <sub>2</sub> O <sub>3</sub> , MnFe-LDH and MnFe-LDH /Mn <sub>2</sub> O <sub>3</sub> respectively.                                                                                                                                    | <b>S12</b>         |
| <b>S6</b>       | (a-c) The area of reduction peak for Mn <sub>2</sub> O <sub>3</sub> /NF, MnFe-LDH and MnFe-LDH/Mn <sub>2</sub> O <sub>3</sub> /NF respectively.                                                                                                                                          | <b>S16</b>         |
| <b>S7</b>       | LSV responses of the taken RRD electrode for the redox reaction of ferro-ferri in 0.1 M KNO <sub>3</sub> with 10 mM of K <sub>3</sub> [Fe(CN) <sub>6</sub> ] at various rotation speed by using RRD electrode.                                                                           | <b>S17</b>         |
| <b>Table S2</b> | Collection Efficiency (N) value for the redox reaction of ferro-ferri in 0.1 M KNO <sub>3</sub> with 10 mM of K <sub>3</sub> [Fe(CN) <sub>6</sub> ] at various rotation speed by RRD electrode                                                                                           | <b>S18</b>         |
| <b>S8</b>       | Linear sweep voltammetric response of (a) Mn <sub>2</sub> O <sub>3</sub> , (b) MnFe-LDH and (c) MnFe-LDH/Mn <sub>2</sub> O <sub>3</sub> in disk electrode for OER, and corresponding ring current information for ORR. Collection efficiency (N) is equal to 0.247.                      | <b>S20</b>         |
| <b>S9</b>       | (a-c) Nyquist plot measured at various applied voltages of Mn <sub>2</sub> O <sub>3</sub> , MnFe-LDH and MnFe-LDH /Mn <sub>2</sub> O <sub>3</sub> respectively.                                                                                                                          | <b>S21</b>         |
| <b>S10</b>      | (a-c) Bode plot of Mn <sub>2</sub> O <sub>3</sub> , MnFe-LDH and MnFe-LDH/Mn <sub>2</sub> O <sub>3</sub> respectively.                                                                                                                                                                   | <b>S22</b>         |
| <b>Table S3</b> | Comparison table for OER activity of MnFe-LDH /Mn <sub>2</sub> O <sub>3</sub> with the similar type of catalyst.                                                                                                                                                                         | <b>S22</b>         |
| <b>Table S4</b> | Comparison table for HER activity of MnFe-LDH /Mn <sub>2</sub> O <sub>3</sub> with the similar type of catalyst.                                                                                                                                                                         | <b>S23</b>         |
| <b>Table S5</b> | Comparison table for total water splitting MnFe-LDH /Mn <sub>2</sub> O <sub>3</sub> /NF with the similar type of catalyst.                                                                                                                                                               | <b>S25</b>         |
| <b>S11</b>      | (a-c) Low and high magnification FE-SEM images post-OER MnFe-LDH/Mn <sub>2</sub> O <sub>3</sub> respectively (d) HRTEM images (e) Lattice fringes (f) SAED pattern (g) HAADF color mapping (h-j) Uniform distribution Mn, Fe, and O respectively of Post-OER MnFe-LDH/Mn <sub>2</sub> O. | <b>S26</b>         |
| <b>S12</b>      | (a-c) The Deconvoluted XPS spectra for Mn 2p, Fe 2p and O 1s orbitals respectively for post-OER study of MnFe-LDH/Mn <sub>2</sub> O <sub>3</sub> .                                                                                                                                       | <b>S27</b>         |
| <b>S13</b>      | (a and b) LSV study of Mn <sub>2</sub> O <sub>3</sub> and MnFe-LDH at various pH of KOH (c and d) LSV study of Mn <sub>2</sub> O <sub>3</sub> and MnFe-LDH at 1.0 M KOH and 1.0 M TMAOH respectively.                                                                                    | <b>S28</b>         |
|                 | <b>References</b>                                                                                                                                                                                                                                                                        | <b>S29</b>         |

**Table S1: Reagents and Instruments:**

The source, company, and purity of the chemicals are given as follows:

| S.No | Chemicals                                    | Company                            | Purity |
|------|----------------------------------------------|------------------------------------|--------|
| 1    | Manganese (II) chloride (MnCl <sub>2</sub> ) | Thermoscientific                   | 98%    |
| 2    | Urea                                         | ThermoFisher Scientific            | 99%    |
| 3    | Ammonium Fluoride (NH <sub>4</sub> F)        | Sisco Research Laboratory (P) Ltd. | 98%    |
| 4    | Ferric chloride (FeCl <sub>3</sub> )         | Alfa Aesar                         | 97%    |
| 5    | Acetone                                      | ThermoFisher Scientific            | 99 %   |
| 6    | Ethanol                                      | Fine chemical                      | 99.9 % |
| 7    | Hydrochloric acid (HCl)                      | ThermoFisher Scientific            | 35-37% |
| 9    | Ni foam                                      | Sigma-Aldrich                      | 99.9%  |
| 10   | Tetramethyl ammonium hydroxide               | ThermoScientific                   | 99.9%  |

Ni foam was used after surface cleaning. Characterization of the catalyst was done by HR-TEM, (Tecnai™ G<sup>2</sup> TF20), operating at an accelerating voltage of 200 kV and elemental color mapping by Talos F-200-S with HAADF. Energy Dispersive X-ray Spectroscopy (EDS) analysis was performed by SUPRA 55VP Carl Zeiss with a separate EDS detector. Scanning Electron Microscopy (SEM) analysis was carried with a Hitachi, Japan (Model S-3000H) having magnification varying from 30X to 300 KX with the accelerating voltage ~ 0.3 to 30 kV. XRD analysis was carried out with a scanning rate of 5° min<sup>-1</sup> in the 2θ range 10-90° using a Rigaku X-ray powder diffractometer (XRD) with Cu K<sub>α</sub> radiation (λ = 0.154 nm). LASER Raman spectroscopic measurements were carried out by green emitting semiconductor as a laser source of 532 nm. For Raman experiment the excitation light intensity is about approximately 10 mW with a spectral collection of time of 1 sec. The integration time for our measurement was set to be 10 s. The electrochemical analyzer AURT-M204 was used for all electrochemical characterizations.<sup>1</sup> Hg/HgO reference electrode (1M KOH) from CH

instruments and platinum as counter electrode from Alfa-Aesar were used throughout the electrochemical studies. The entire experiments were conducted using deionised water. The overall potential data was obtained by utilising Hg/HgO (reference electrode), which was converted into an RHE ( $E_{RHE}$ ) scale by the Nernst equation

$$E_{RHE} = E_{ref} + 14 \times 0.059 + 0.098 \dots \dots \dots 1$$

Over potential ( $\eta$ ) value of MnFe-LDH/Mn<sub>2</sub>O<sub>3</sub> to attain a current density of 50 mA/cm<sup>2</sup> is calculated by the following equation:

$$\eta = E_{RHE} - 1.23 \text{ V (for OER)} \dots \dots \dots 2$$

The Tafel equation was fitted to match  $\eta$  vs. log (current density) after determining the Tafel slope from data of the LSV polarization curve.

$$\eta = a + b \times \log (j) \dots \dots \dots 3$$

where j-current density, b-Tafel slope value. To carry out Electrochemical impedance spectroscopy (EIS) measurements the frequency ranges chosen from 10<sup>5</sup> to 0.1 Hz at 325 mV of overpotential value for OER. Also, Operando-EIS study was performed by using a carbon cloth (CC) electrode-working electrode at a various applied potential. The double layer capacitance ( $C_{dl}$ ) value can be calculated by evaluating as given below:

$$\Delta J = v \times C_{dl} \dots \dots \dots 4$$

$\Delta J$  - current in double-layer capacitance obtaining from scan-rates (v) in the non-faradic potential region.<sup>2</sup>

For the RRDE experiment, 4 mg of MnFe-LDH/Mn<sub>2</sub>O<sub>3</sub> catalyst was added to a solution containing 200  $\mu$ L of ethanol, 750  $\mu$ L of H<sub>2</sub>O, and 50  $\mu$ L of 5% Nafion solution. To prepare a homogeneous catalyst ink mixture was sonicated for 20 min. Later, 15  $\mu$ L of homogeneous ink

was drop-casted over the GC disk of RRDE set up with an effective surface area of  $\approx 0.197$   $\text{cm}^2$ . The Pt ring was used with a constant potential of  $-0.6$  V versus RHE to reduce the as-formed  $\text{O}_2$  in situ.<sup>3</sup> The FE was calculated from the ratio of the ring current to the disk using the following expression:

$$\text{FE} = I_{\text{ring}} / (I_{\text{disk}} \times N) \times 100 \dots\dots\dots 5$$

where, “ $I_{\text{ring}}$ ” and “ $I_{\text{disk}}$ ” are the ring and disk current density in  $\text{mA cm}^{-2}$ , respectively; “ $N$ ” is the collection efficiency having a constant value of 0.247.

**Synthesis route of Mn<sub>2</sub>O<sub>3</sub>/NF:**

Initially, the NF was cut into  $0.5 \times 4 \text{ cm}^2$  and cleaned with 1 M HCl, distilled water, acetone and ethanol for almost 20 minutes. Mn<sub>2</sub>O<sub>3</sub> was made over NF by one-step hydrothermal and annealing process. For the synthesis of Mn<sub>2</sub>O<sub>3</sub> over NF, 5 mmol of MnCl<sub>2</sub>, 25 mmol of Urea, and 10 mmol of NH<sub>4</sub>F were dissolved in 35 ml of DI water into a Teflon linked autoclave. The NF was also transferred into the autoclave with dissolved solution and sealed properly. The autoclave was kept in the hot air oven at 120 °C for 6 h. Later, the in-situ grown Mn(OH)<sub>2</sub> over NF was cleaned for several times with DI water and dried at 60°C. The dried (MnOH<sub>2</sub>)/NF was undergoing an annealing process 350°C at 4h. The Mn<sub>2</sub>O<sub>3</sub> was collected as a black powder sample, as well as nickel foam.

**Synthesis of MnFe-LDH/NF:**

For comparison, MnFe-LDH/NF was synthesized by using the similar procedure adopted for the synthesis of MnFe-LDH/Mn<sub>2</sub>O<sub>3</sub>/NF without the inclusion of in-situ grown Mn<sub>2</sub>O<sub>3</sub>/NF in a Teflon-lined stainless-steel autoclave.

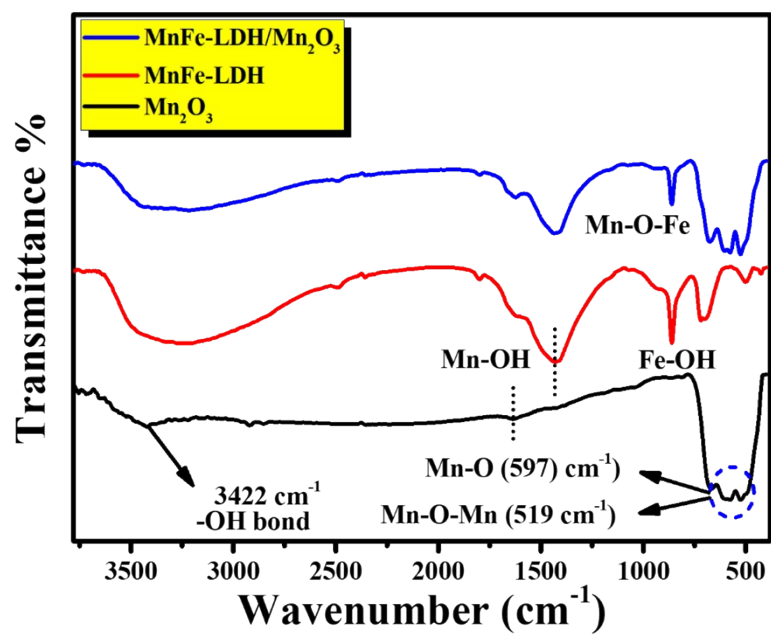

Figure S1: IR spectra for Mn<sub>2</sub>O<sub>3</sub>, MnFe-LDH and MnFe-LDH/Mn<sub>2</sub>O<sub>3</sub>.

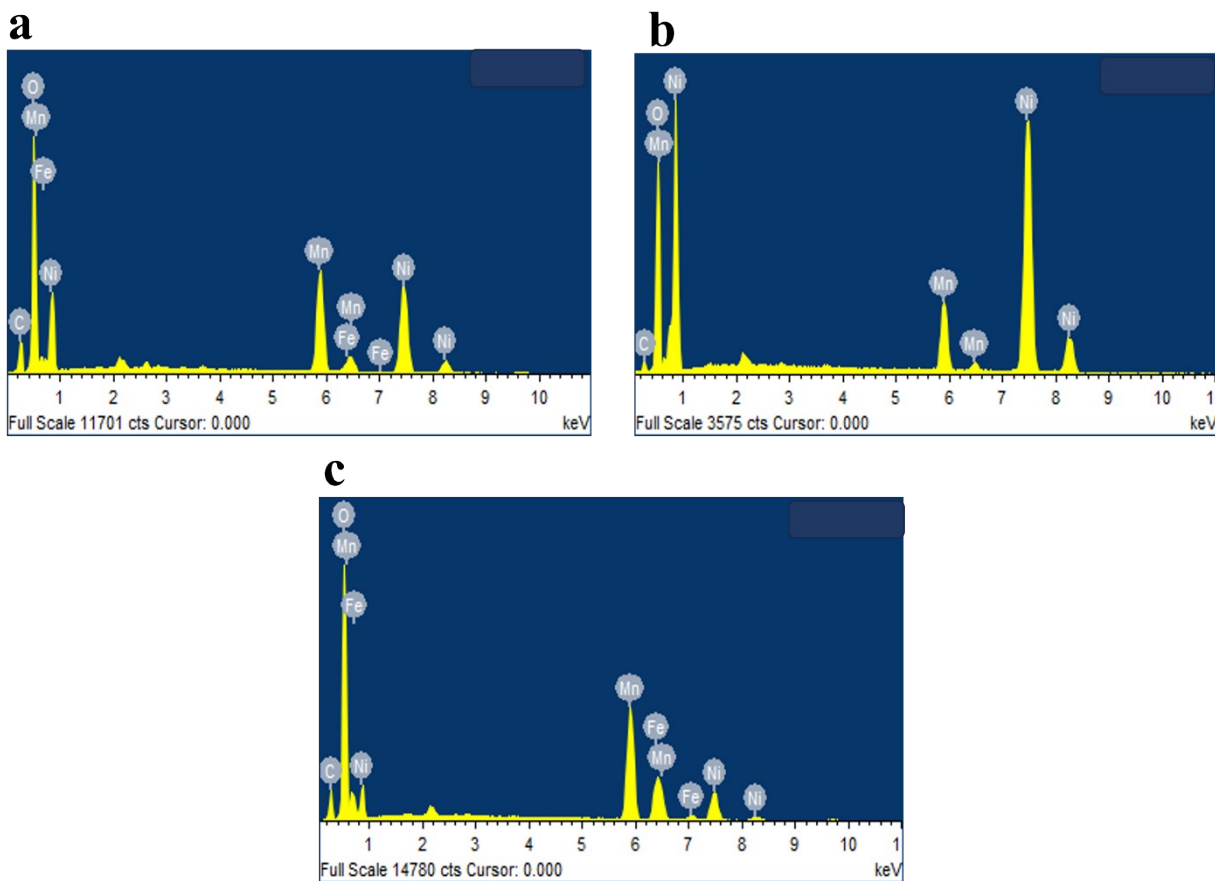

**Figure S2:** EDS spectrum of (a)  $Mn_2O_3$  (b) MnFe-LDH and (c) MnFe-LDH/ $Mn_2O_3$  from FE-SEM showing the presence of all the expected elements.

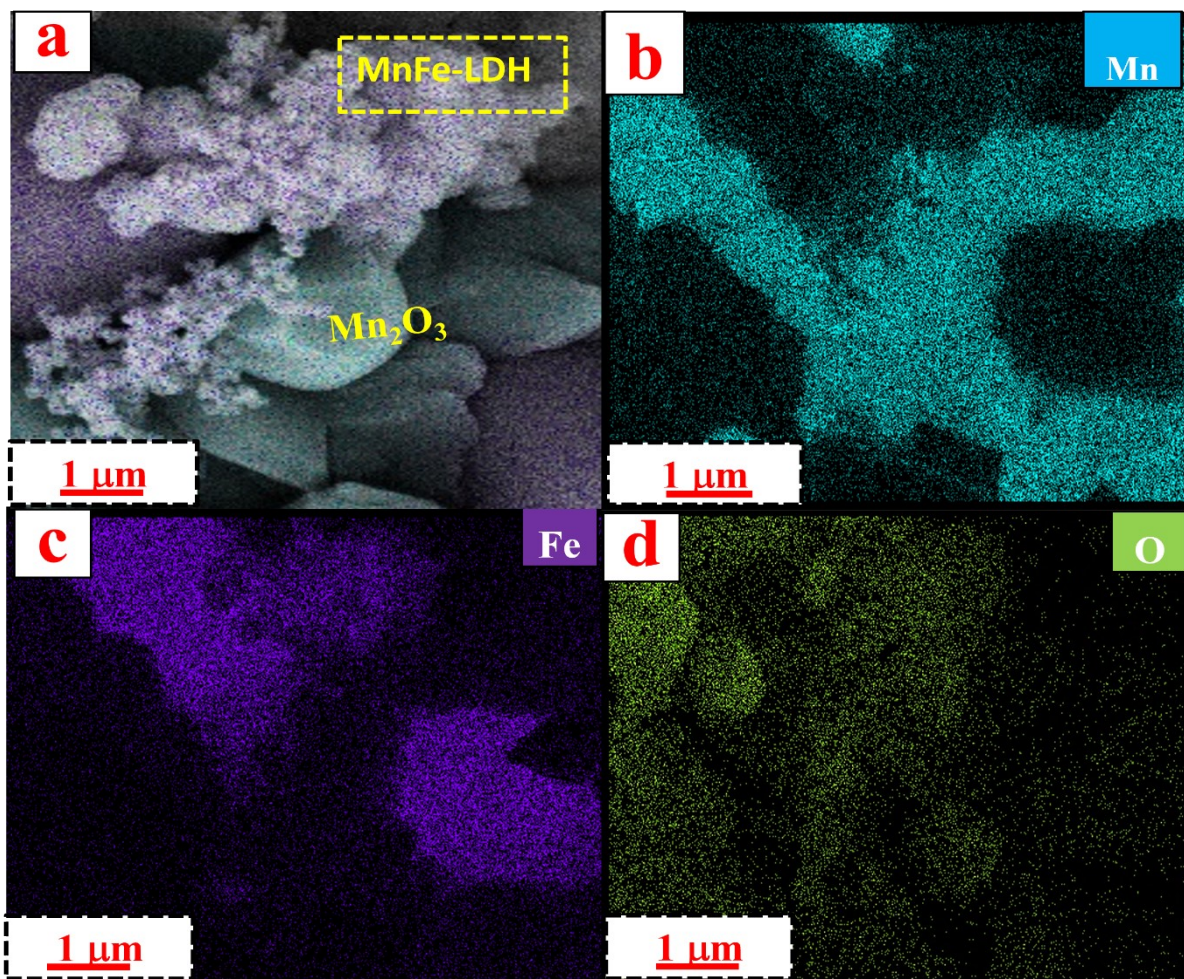

**Figure S3:** (a) Colour mapping images MnFe-LDH/Mn<sub>2</sub>O<sub>3</sub> from FE-SEM, (b-d) Uniform distribution of Mn, Fe, and O elements respectively.

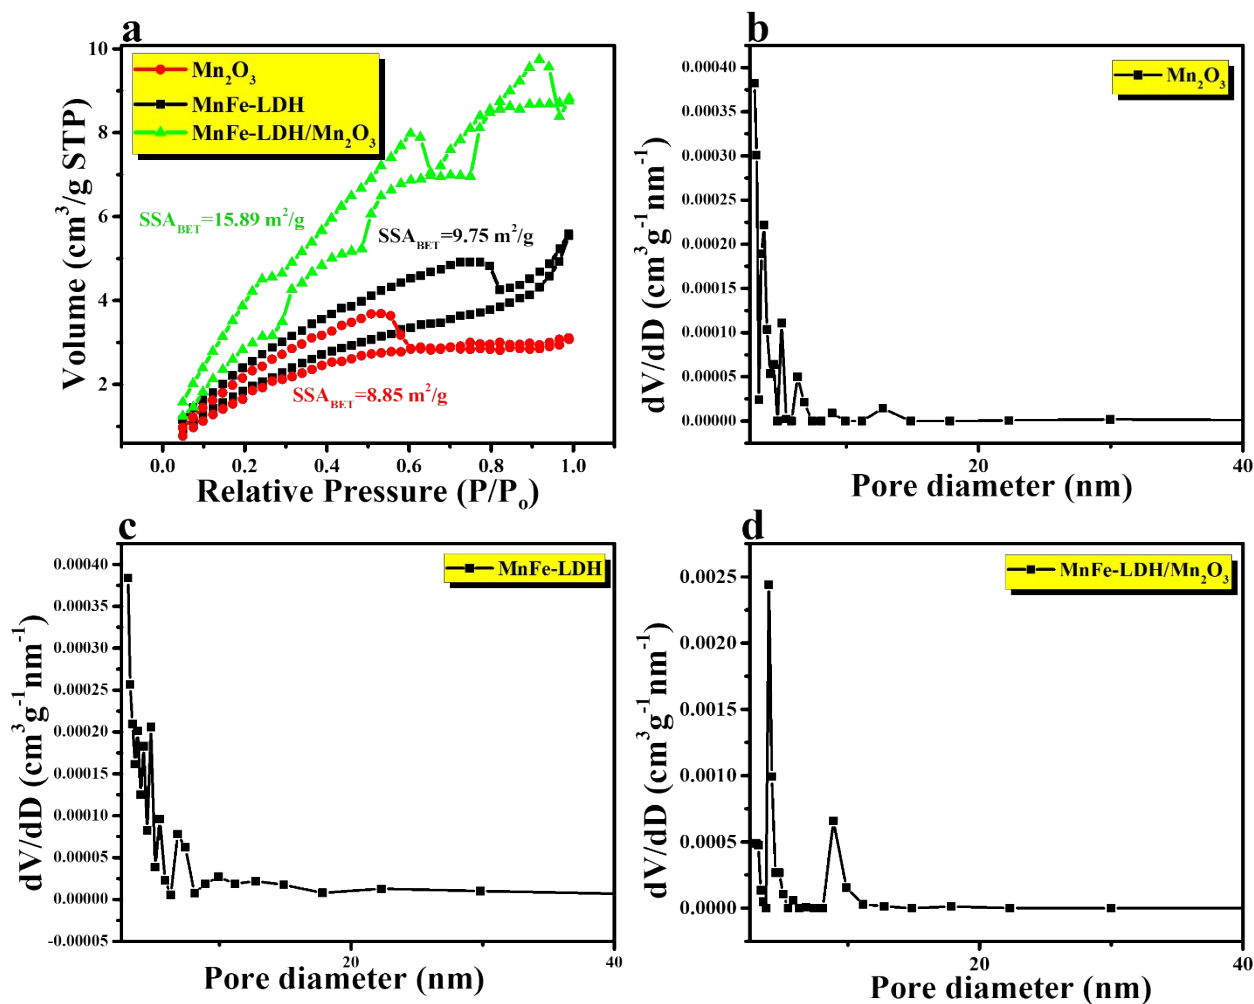

**Figure S4:** (a) shows N<sub>2</sub> adsorption-desorption of  $\text{Mn}_2\text{O}_3$ , MnFe-LDH and MnFe-LDH/ $\text{Mn}_2\text{O}_3$  and (b-d) Pore size distribution diagram of  $\text{Mn}_2\text{O}_3$ , MnFe-LDH and MnFe-LDH/ $\text{Mn}_2\text{O}_3$  respectively.

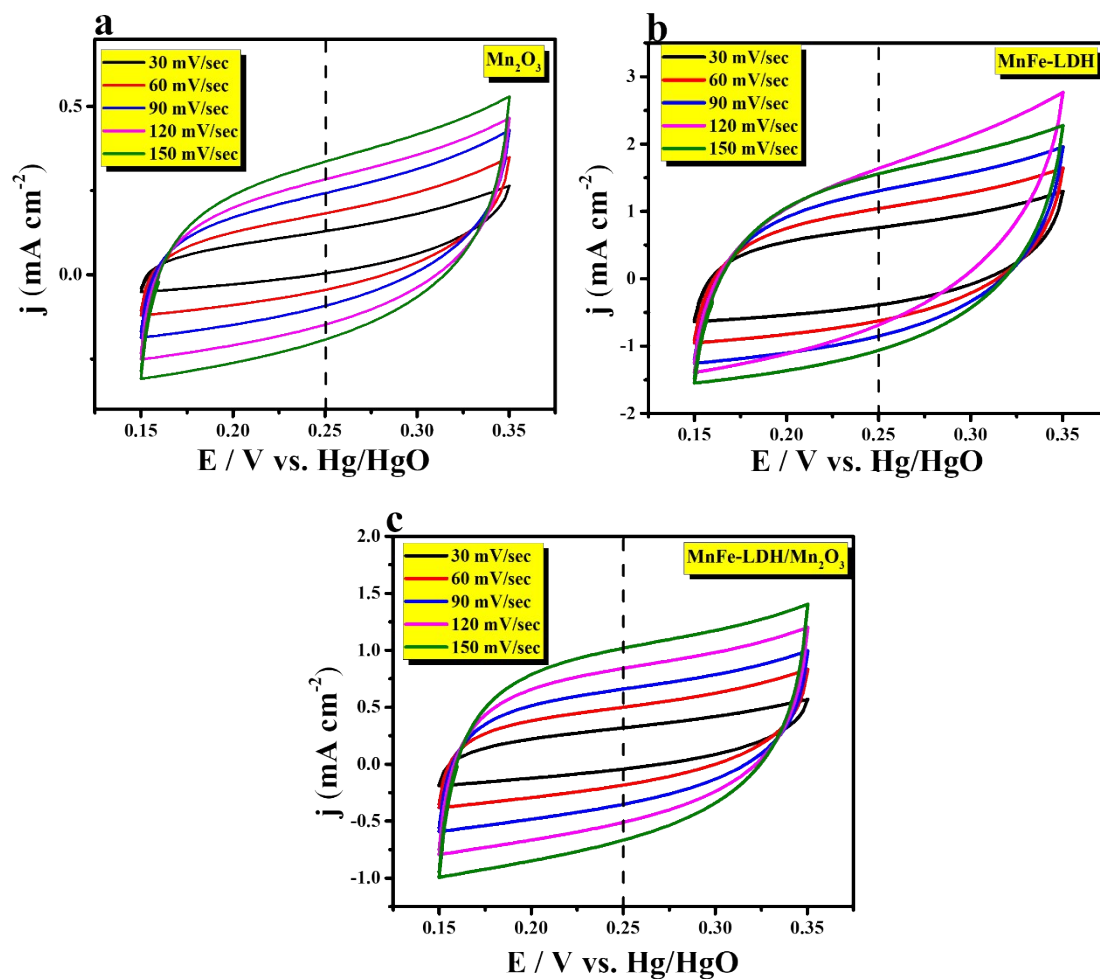

**Figure S5:** (a-c) The electrochemically effective surface area for Mn<sub>2</sub>O<sub>3</sub>, MnFe-LDH and MnFe-LDH /Mn<sub>2</sub>O<sub>3</sub> respectively.

### Estimation of the electrochemical double-layer capacitance ( $C_{dl}$ )

To calculate the electrochemical double-layer capacitance for  $Mn_2O_3$ , MnFe-LDH, and MnFe-LDH/ $Mn_2O_3$  the cyclic voltammetry methods were performed with various scan rates ranging from 30 mV/s to 150 mV/s with a step of 30 mV/s. The potential is scanned from 0.15 to 0.35 V vs Hg/HgO where no faradic current was observed. The center of this working potential (i.e., 0.25 V) was selected to calculate  $\Delta J_0$  (vs Hg/HgO). Hence, we plotted the differences in current densities ( $\Delta J = J_a - J_c$ ) at 0.25 V (vs. Hg/HgO) against the scan rates. Hence, the electrochemical double-layer capacitance was calculated using the formula below.

Hence, the electrochemical double-layer capacitance was measured by using the formula

a. For  $Mn_2O_3$  in 1.0 M KOH

$$C_{dl} = \frac{(0.50 - 0.12)(mA/cm^2)}{(150 - 30)(mV/s)} = 3.3 \text{ mFcm}^{-2}$$

b. For MnFe-LDH in 1.0 M KOH

$$C_{dl} = \frac{(2.46 - 1.15)(mA/cm^2)}{(150 - 30)(mV/s)} = 10.91 \text{ mFcm}^{-2}$$

c. For MnFe-LDH/ $Mn_2O_3$  in 1.0 M KOH

$$C_{dl} = \frac{(1.83 - 0.361)(mA/cm^2)}{(150 - 30)(mV/s)} = 12.24 \text{ mFcm}^{-2}$$

**The ECSA can be calculated from the  $C_{dl}$  according to:**

$$\text{ECSA for } Mn_2O_3 = \frac{3.3 \text{ mFcm}^{-2}}{0.04 \text{ mF cm}^{-2} \text{ cm}_{ECSA}^{-2}} = 82.5 \text{ cm}_{ECSA}^2$$

$$\text{ECSA for MnFe-LDH} = \frac{10.9 \text{ mFcm}^{-2}}{0.04 \text{ mF cm}^{-2} \text{ cm}_{ECSA}^{-2}} = 272.5 \text{ cm}_{ECSA}^2$$

$$\text{ECSA for MnFe-LDH/Mn}_2\text{O}_3 = \frac{12.24 \text{ mF cm}^{-2}}{0.04 \text{ mF cm}^{-2} \text{ cm}_{\text{ECSA}}^{-2}} = 306 \text{ cm}_{\text{ECSA}}^2$$

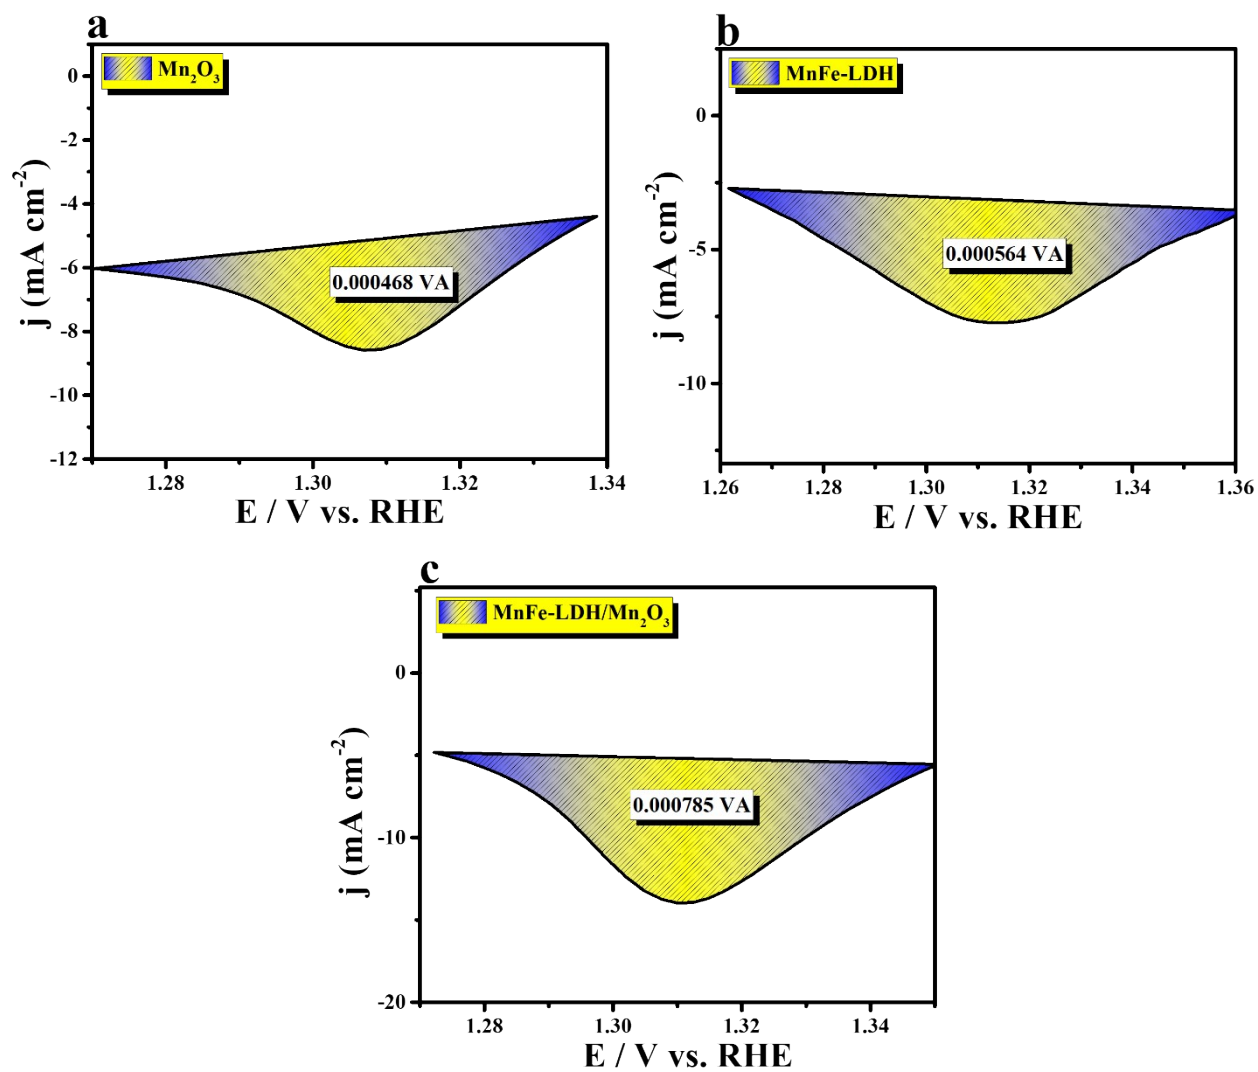

**Figure S6:** (a-c) The area of reduction peak for Mn<sub>2</sub>O<sub>3</sub>/NF, MnFe-LDH and MnFe-LDH/Mn<sub>2</sub>O<sub>3</sub>/NF respectively.

**Determination of various Surface concentration in Mn<sub>2</sub>O<sub>3</sub> from the redox features of CV:**

Calculated area associated with the reduction of Mn<sup>3+</sup> to Mn<sup>2+</sup> of Mn<sub>2</sub>O<sub>3</sub>

$$= 0.000468 \text{ VA}$$

Hence, the associated charge is =  $0.468 \text{ VA} / 0.005 \text{ Vs}^{-1}$   $\longrightarrow$  **(Equation 6)**

$$= 0.0936 \text{ As}$$

$$= \mathbf{93.6 \text{ C}}$$

Now, the number of electrons transferred is

$$= 0.0936 \text{ C} / 1.602 \times 10^{-19} \text{ C} \quad \longrightarrow \text{(Equation 7)}$$

$$= \mathbf{5.840 \times 10^{17}}$$

Since, the reduction of Mn<sup>3+</sup> to Mn<sup>2+</sup> is a single electron transfer reaction, the number electron calculated above is exactly the same as the number of surface-active sites.

Hence, the number of Mn participate in OER is =  $\mathbf{5.840 \times 10^{17}}$

Hence, Determination of Turnover Frequency (TOF) from OER Current Density TOF in our study was calculated assuming that the surface-active Mn atoms that had undergone the redox reaction just before onset of OER only participated in OER electrocatalysis. The corresponding expression is,

$$\text{TOF} = j \times N_A / F \times n \times \Gamma \quad \longrightarrow \text{(Equation 8)}$$

Where,  $j$  = current density  $N_A$  = Avogadro number  $F$  = Faraday constant  $n$  = Number of electrons  $\Gamma$  = Surface concentration.

$$\text{TOF} = [(4.4 \times 10^{-3}) (6.023 \times 10^{23})] / [(96485) (4) (5.840 \times 10^{17})]$$

$$= \mathbf{0.11 \text{ s}^{-1}}$$

Calculated area associated with the reduction of  $\text{Mn}^{3+}$  to  $\text{Mn}^{2+}$  of **MnFe-LDH**

$$= 0.000564 \text{ VA}$$

Hence, the associated charge is  $= 0.000564 \text{ VA} / 0.005 \text{ Vs}^{-1} \longrightarrow$  **(Equation 9)**

$$= 0.1128 \text{ As}$$

$$= \mathbf{0.1128 \text{ C}}$$

Now, the number of electrons transferred is

$$= 0.1128 \text{ C} / 1.602 \times 10^{-19} \text{ C} \longrightarrow$$
 **(Equation 10)**

$$= \mathbf{7.0412 \times 10^{17}}$$

Since, the reduction of  $\text{Mn}^{3+}$  to  $\text{Mn}^{2+}$  is a single electron transfer reaction, the number electron calculated above is exactly the same as the number of surface-active sites.

Hence, the number of Mn participating in OER is  $= \mathbf{7.0412 \times 10^{17}}$

Hence, the Determination of Turnover Frequency (TOF) from OER Current Density TOF in our study was calculated assuming that the surface-active Mn atoms that had undergone the redox reaction just before onset of OER only participated in OER electrocatalysis. The corresponding expression is,

$$\text{TOF} = j \times N_A / F \times n \times \Gamma \longrightarrow$$
 **(Equation 11)**

Where,  $j$  = current density  $N_A$  = Avogadro number  $F$  = Faraday constant  $n$  = Number of electrons  $\Gamma$  = Surface concentration.

$$\text{TOF} = [(7.4 \times 10^{-3}) (6.023 \times 10^{23})] / [(96485) (4) (7.0412 \times 10^{17})]$$

$$= \mathbf{0.16 \text{ s}^{-1}}$$

Calculated area associated with the reduction of  $\text{Mn}^{3+}$  to  $\text{Mn}^{2+}$  of  $\text{MnFe-LDH/Mn}_2\text{O}_3$

$$= 0.000785 \text{ VA}$$

Hence, the associated charge is  $= 0.000785 \text{ VA} / 0.005 \text{ Vs}^{-1} \longrightarrow$  **(Equation 12)**

$$= 0.157 \text{ As}$$

$$= 0.157 \text{ C}$$

Now, the number of electrons transferred is

$$= 0.157 \text{ C} / 1.602 \times 10^{-19} \text{ C} \longrightarrow$$
 **(Equation 13)**

$$= 9.8 \times 10^{17}$$

Since, the reduction of  $\text{Mn}^{3+}$  to  $\text{Mn}^{2+}$  is a single electron transfer reaction, the number electron calculated above is exactly the same as the number of surface-active sites.

Hence, the number of Mn participating in OER is  $= 9.821 \times 10^{17}$

Hence, the Determination of Turnover Frequency (TOF) from OER Current Density TOF in our study was calculated assuming that the surface-active Mn atoms that had undergone the redox reaction just before onset of OER only participated in OER electrocatalysis. The corresponding expression is,

$$\text{TOF} = j \times N_A / F \times n \times \Gamma \longrightarrow$$
 **(Equation 14)**

Where,  $j$  = current density  $N_A$  = Avogadro number  $F$  = Faraday constant  $n$  = Number of electrons  $\Gamma$  = Surface concentration.

$$\text{TOF} = [(294 \times 10^{-3}) (6.023 \times 10^{23})] / [(96485) (4) (9.824 \times 10^{17})]$$

$$= 0.47 \text{ s}^{-1}$$

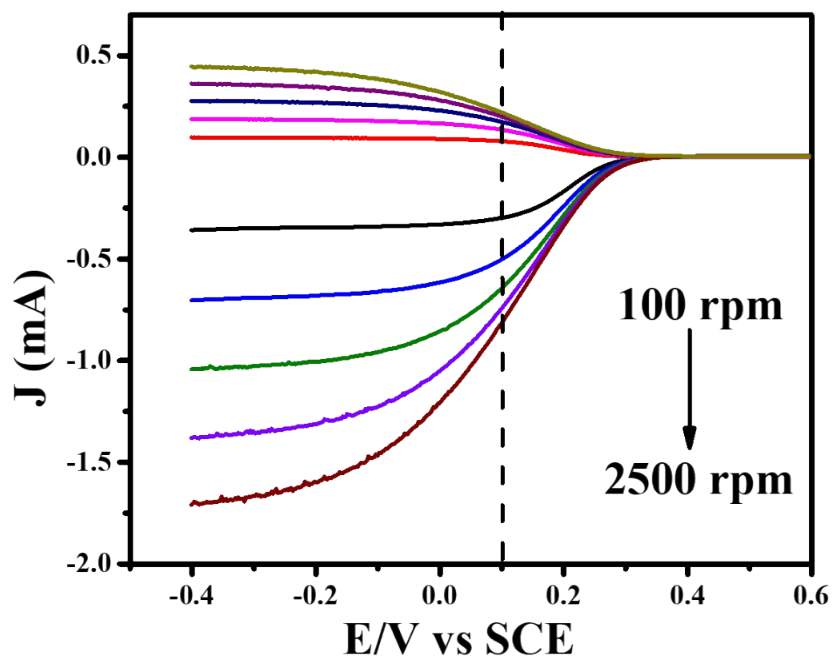

**Figure S7:** LSV responses of the taken RRD electrode for the redox reaction of ferro-ferri in 0.1 M  $\text{KNO}_3$  with 10 mM of  $\text{K}_3[\text{Fe}(\text{CN})_6]$  at various rotation speed by using RRD electrode.

**Table S2:** Collection Efficiency (N) value for the redox reaction of ferro-ferri in 0.1 M KNO<sub>3</sub> with 10 mM of K<sub>3</sub>[Fe(CN)<sub>6</sub>] at various rotation speed by RRD electrode.

| <b>S.No</b> | <b>Rotation speed (RPM)</b> | <b>Disc current (mA)</b> | <b>Ring current (mA)</b> | <b>Collection Efficiency (N)</b> |
|-------------|-----------------------------|--------------------------|--------------------------|----------------------------------|
| 1           | 100                         | 0.297                    | 0.074                    | 0.249158249                      |
| 2           | 400                         | 0.505                    | 0.125                    | 0.247524752                      |
| 3           | 900                         | 0.637                    | 0.157                    | 0.246467818                      |
| 4           | 1600                        | 0.747                    | 0.184                    | 0.246318608                      |
| 5           | 2500                        | 0.857                    | 0.212                    | 0.247374562                      |
|             |                             |                          | Average                  | 0.247368                         |

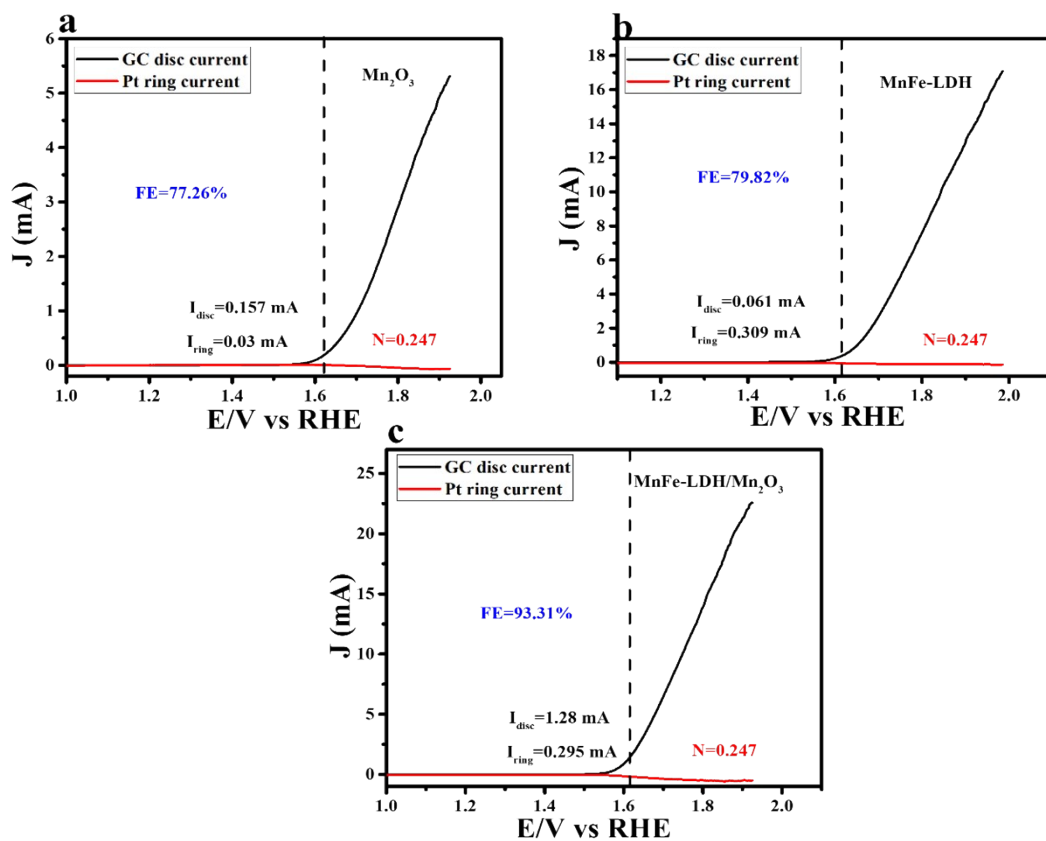

**Figure S8:** Linear sweep voltammetric response of (a)  $Mn_2O_3$ , (b) MnFe-LDH and (c) MnFe-LDH/ $Mn_2O_3$  in disk electrode for OER, and corresponding ring current information for ORR. Collection efficiency ( $N$ ) is equal to 0.247.

### Calculation of Faradaic Efficiency (FE):

The Faradaic Efficiency for Mn<sub>2</sub>O<sub>3</sub> in OER process was calculated by using Rotating Ring-Disk (RRD) technique as follows:

Ring current for complex 1 ( $I_{ring}$ ) = 0.03 mA

Disc current for complex 1 ( $I_{disc}$ ) = 0.157 mA

Collection Efficiency (N) = 0.247 (The Collection Efficiency (N) value calculated experimentally by using ferri/ferrocyanide system in 0.1 M KNO<sub>3</sub> with 10 mM K<sub>3</sub>[Fe(CN)<sub>6</sub>], the data are given in **Figure S7** and **Table S2**)

Faradaic Efficiency in Mn<sub>2</sub>O<sub>3</sub> in OER process

$$= \frac{I_{ring}}{N * I_{disc}} = \frac{0.03 \text{ mA}}{0.247 * 0.157 \text{ mA}} = 0.7726 * 100 = 77.26\%$$

The Faradaic Efficiency for MnFe-LDH in OER process was calculated by using the Rotating Ring-Disk (RRD) technique as follows:

Ring current for complex 1 ( $I_{ring}$ ) = 0.061 mA

Disc current for complex 1 ( $I_{disc}$ ) = 0.309 mA

Collection Efficiency (N) = 0.247

Faradaic Efficiency in MnFe-LDH in OER process

$$= \frac{I_{ring}}{N * I_{disc}} = \frac{0.061 \text{ mA}}{0.249 * 0.309 \text{ mA}} = 0.777 * 100 = 77.7$$

The Faradaic Efficiency for MnFe-LDH/Mn<sub>2</sub>O<sub>3</sub> in OER process was calculated by using the Rotating Ring-Disk (RRD) technique as follows:

Ring current for complex 1 ( $I_{ring}$ ) = 0.295 mA

Disc current for complex 1 ( $I_{disc}$ ) = 1.28 mA

Collection Efficiency (N) = 0.247

Faradaic Efficiency in MnFe-LDH/Mn<sub>2</sub>O<sub>3</sub> in OER process

$$= \frac{I_{ring}}{N * I_{disc}} = \frac{0.295 \text{ mA}}{0.247 * 1.28 \text{ mA}} = 0.9331 * 100 = 93.31\%$$

Faradaic Efficiency of MnFe-LDH/Mn<sub>2</sub>O<sub>3</sub> for other catalytic process can be calculated as follows:

Faradaic Efficiency for other catalytic process possibly catalytic activation, formation of hydrogen peroxide, and catalytic corrosion in MnFe-LDH/Mn<sub>2</sub>O<sub>3</sub>

=100 % - Faradaic Efficiency for other catalytic process in MnFe-LDH/Mn<sub>2</sub>O<sub>3</sub>  
 =100 % -93.31% = 7.2%

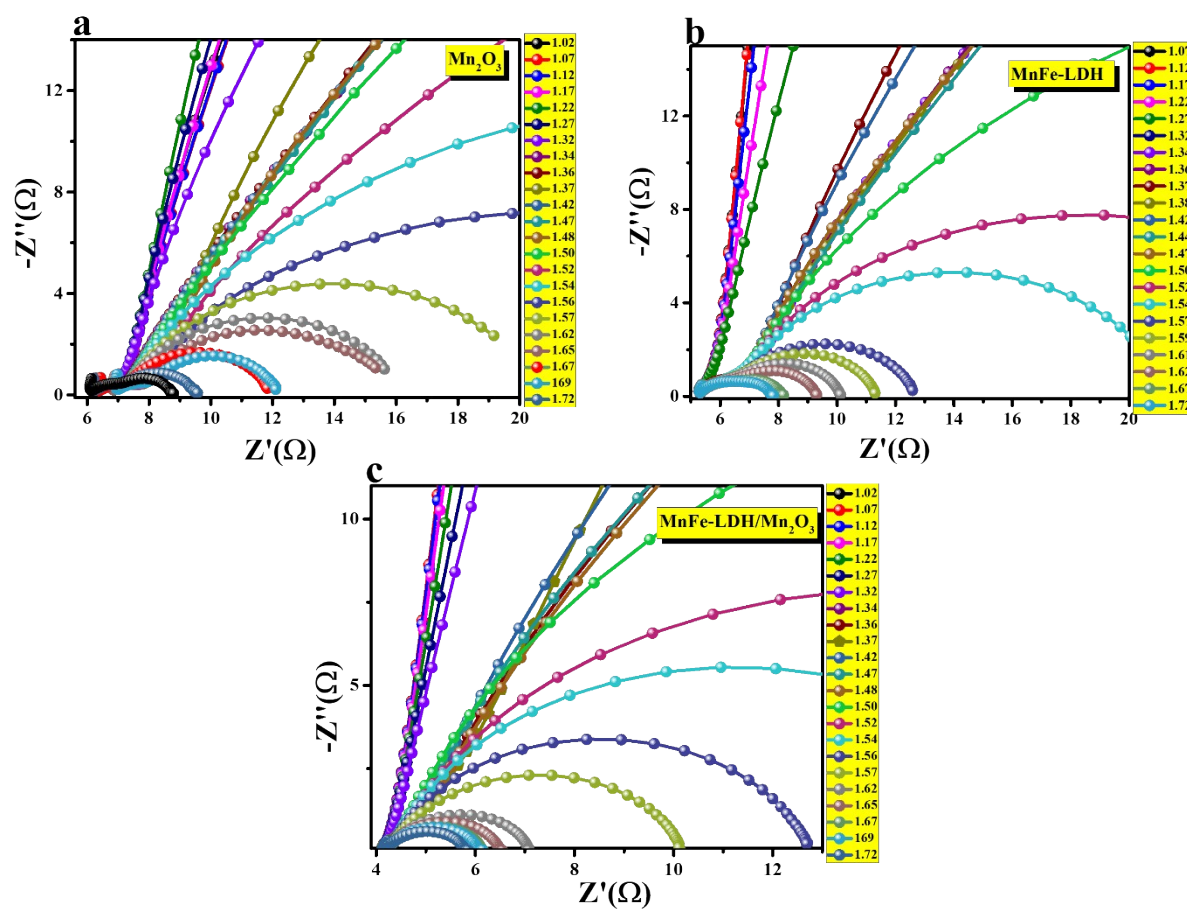

**Figure S9:** (a-c) Nyquist plot measured at various applied voltages of Mn<sub>2</sub>O<sub>3</sub>, MnFe-LDH and MnFe-LDH /Mn<sub>2</sub>O<sub>3</sub> respectively.

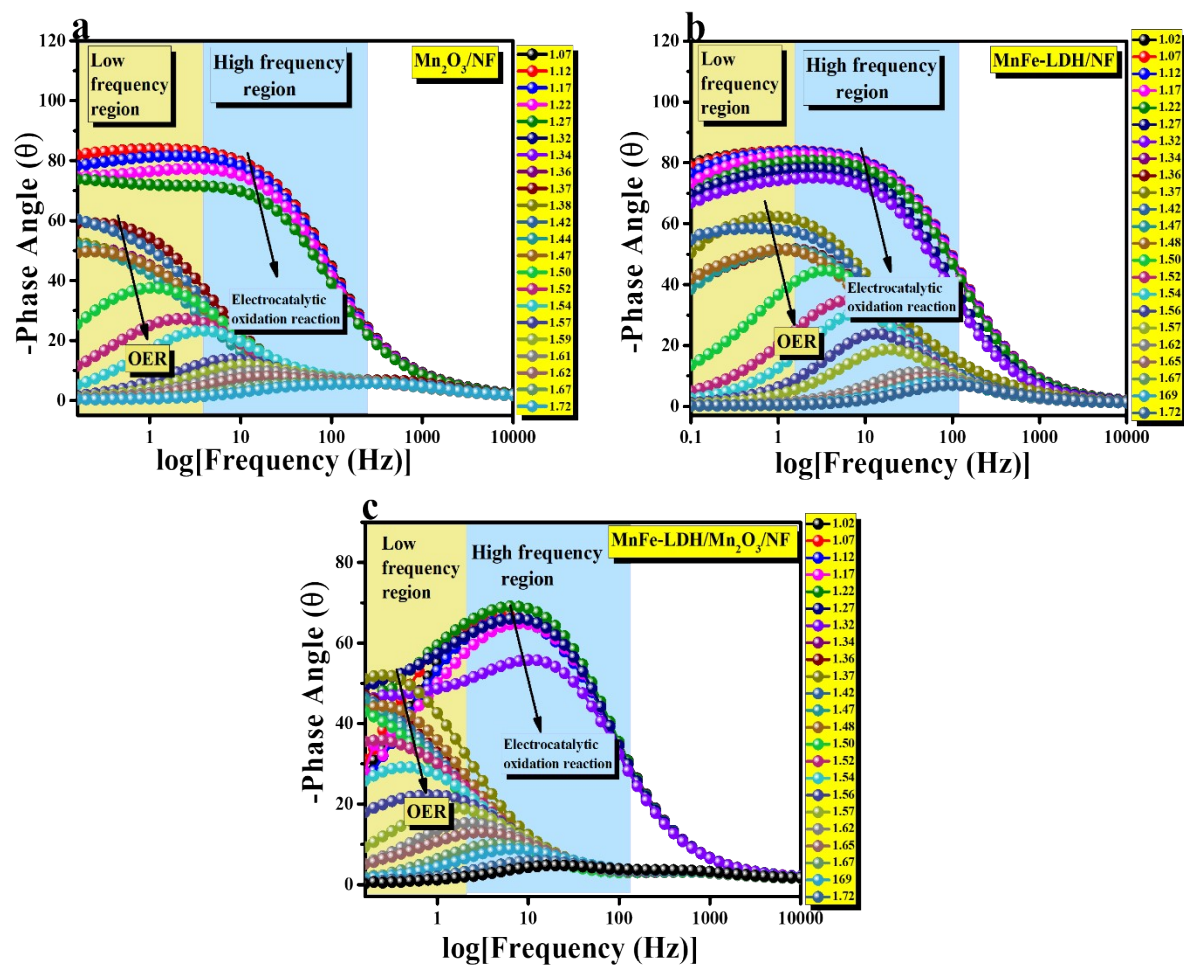

**Figure S10:** (a-c) Bode plot of  $\text{Mn}_2\text{O}_3$ ,  $\text{MnFe-LDH}$  and  $\text{MnFe-LDH/Mn}_2\text{O}_3$

**Table S3:** Comparison table for OER activity of MnFe-LDH/Mn<sub>2</sub>O<sub>3</sub>/NF with the similar type of catalyst.

| S.No | Catalyst                                       | Electrolyte    | Overpotential (mV) @ 10 mAcm <sup>-2</sup> | Tafel value (mV dec <sup>-1</sup> ) | OER Stability | Reference       |
|------|------------------------------------------------|----------------|--------------------------------------------|-------------------------------------|---------------|-----------------|
| 1    | A bio-derived carbon/MnFe-LDH (MnFe-C)         | 1 M KOH        | 280                                        | 86                                  | 25            | 4               |
| 2    | B-CQDs/MnFeSe/NF                               | 1 M KOH        | 197                                        | 74.61                               | 21            | 5               |
| 3    | Mo-NiSe <sub>2</sub> /CoSe <sub>2</sub> /NF    | 1 M KOH        | 270                                        | 49                                  | 24            | 6               |
| 4    | MnNiCoS <sub>2</sub> /NF                       | 1 M KOH        | 310                                        | 120                                 | 42            | 7               |
| 5    | FeMn-LDH/MoS <sub>2</sub>                      | 1 M KOH        | 222                                        | 33.3                                | 25            | 8               |
| 6    | D-NiMn LDH/FeS                                 | 1 M KOH        | 184                                        | 49                                  | 26            | 9               |
| 7    | NiCoMnFe-P                                     | 1 M KOH        | 279                                        | 53.1                                | 17            | 10              |
| 8    | NiSe@MnFe-LDH/NF                               | 1 M KOH        | 244                                        | 53.6                                | 15            | 11              |
| 9    | MnNi-LDH/Ni Foam                               | 1 M KOH        | 327                                        | 61                                  | 24            | 12              |
| 10   | <b>MnFeLDH/Mn<sub>2</sub>O<sub>3</sub>/NF/</b> | <b>1 M KOH</b> | <b>280</b>                                 | <b>114</b>                          | <b>36</b>     | <b>our work</b> |

**Table S4:** Comparison table for HER activity of MnFe-LDH/Mn<sub>2</sub>O<sub>3</sub>/NF with the similar type of catalyst.

| S.No | Catalyst                                      | Electrolyte    | Over Potential (mV)@ 10 mAcm <sup>-2</sup> | Tafel value (mVdec <sup>-1</sup> ) | Reference       |
|------|-----------------------------------------------|----------------|--------------------------------------------|------------------------------------|-----------------|
| 1    | A bio-derived carbon/MnFe-LDH (MnFe-C)        | 1 M KOH        | 120                                        | 92                                 | 4               |
| 2    | B-CQDs/MnFeSe/NF                              | 1 M KOH        | 89                                         | 99.6                               | 5               |
| 3    | Mo-NiSe <sub>2</sub> /CoSe <sub>2</sub> /NF   | 1 M KOH        | 99                                         | 85                                 | 6               |
| 4    | MnNiCoS <sub>2</sub> /NF                      | 1 M KOH        | 100                                        | 75                                 | 7               |
| 5    | FeMn-LDH/MoS <sub>2</sub>                     | 1 M KOH        | 120                                        | 112                                | 8               |
| 6    | D-NiMn LDH/FeS                                | 1 M KOH        | 184                                        | 49                                 | 9               |
| 7    | NiCoMnFe-P                                    | 1 M KOH        | 140                                        | 116.9                              | 10              |
| 8    | NiSe@MnFe-LDH/NF                              | 1 M KOH        | 193                                        | 74.3                               | 11              |
| 9    | MnNi-LDH/Ni Foam                              | 1 M KOH        | 327                                        | 110                                | 12              |
| 10   | <b>MnFeLDH/Mn<sub>2</sub>O<sub>3</sub>/NF</b> | <b>1 M KOH</b> | <b>66</b>                                  | <b>86</b>                          | <b>our work</b> |

**Table S5:** Comparison table for Total water splitting of MnFe-LDH/Mn<sub>2</sub>O<sub>3</sub>/NF with the similar type of catalyst.

| S.No | Catalyst                                        | Electrolyte    | Water splitting Voltage(V) | Current Density (mAcm <sup>-2</sup> ) | Reference       |
|------|-------------------------------------------------|----------------|----------------------------|---------------------------------------|-----------------|
| 1    | A bio-derived carbon/MnFe-LDH (MnFe-C)          | 1 M KOH        | 1.60                       | 10                                    | 4               |
| 2    | B-CQDs/MnFeSe/NF                                | 1 M KOH        | 1.52                       | 10                                    | 5               |
| 3    | Mo-NiSe <sub>2</sub> /CoSe <sub>2</sub> /NF     | 1 M KOH        | 1.51                       | 10                                    | 6               |
| 4    | MnNiCoS <sub>2</sub> /NF                        | 1 M KOH        | 1.49                       | 10                                    | 7               |
| 5    | FeMn-LDH/MoS <sub>2</sub>                       | 1 M KOH        | 1.64                       | 10                                    | 8               |
| 6    | D-NiMn LDH/FeS                                  | 1 M KOH        | 1.50                       | 10                                    | 9               |
| 7    | NiCoMnFe-P                                      | 1 M KOH        | 1.7                        | 10                                    | 10              |
| 8    | NiSe@MnFe-LDH/NF                                | 1 M KOH        | 1.51                       | 10                                    | 11              |
| 9    | MnNi LDH/Ni Foam                                | 1 M KOH        | 1.85                       | 10                                    | 12              |
| 10   | <b>MnFe-LDH/Mn<sub>2</sub>O<sub>3</sub>/NF/</b> | <b>1 M KOH</b> | <b>1.56</b>                | <b>10</b>                             | <b>our work</b> |

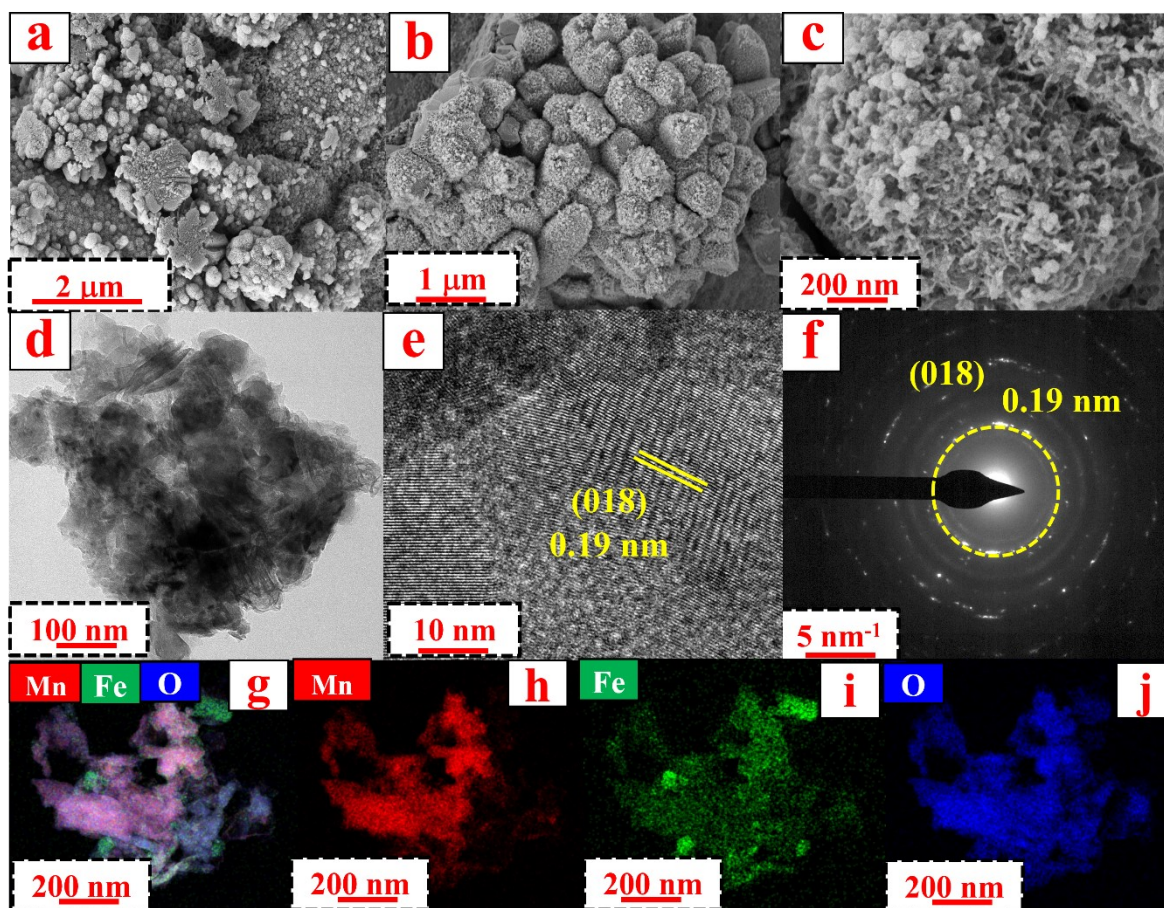

**Figure S11:** (a-c) Low and high magnification FE-SEM images post-OER MnFe-LDH/Mn<sub>2</sub>O<sub>3</sub> respectively.: (d) HRTEM images (e) Lattice fringes (f) SAED pattern (g) HAADF color mapping (h-j) Uniform distribution Mn, Fe, and O respectively of Post-OER MnFe-LDH/Mn<sub>2</sub>O.

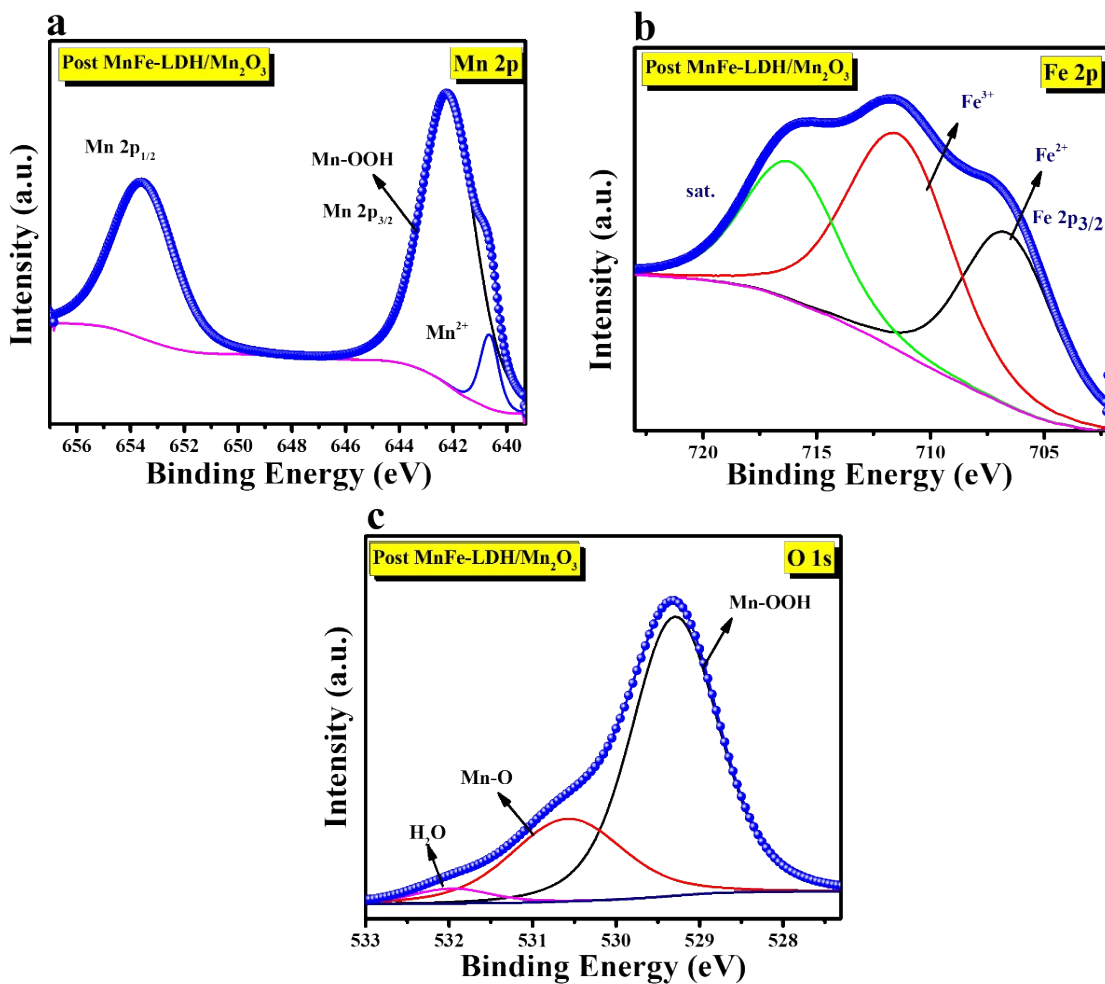

**Figure S12:** (a-c) The Deconvoluted XPS spectra for Mn 2p, Fe 2p and O 1s orbitals respectively for post-OER study of MnFe-LDH/Mn<sub>2</sub>O<sub>3</sub>.

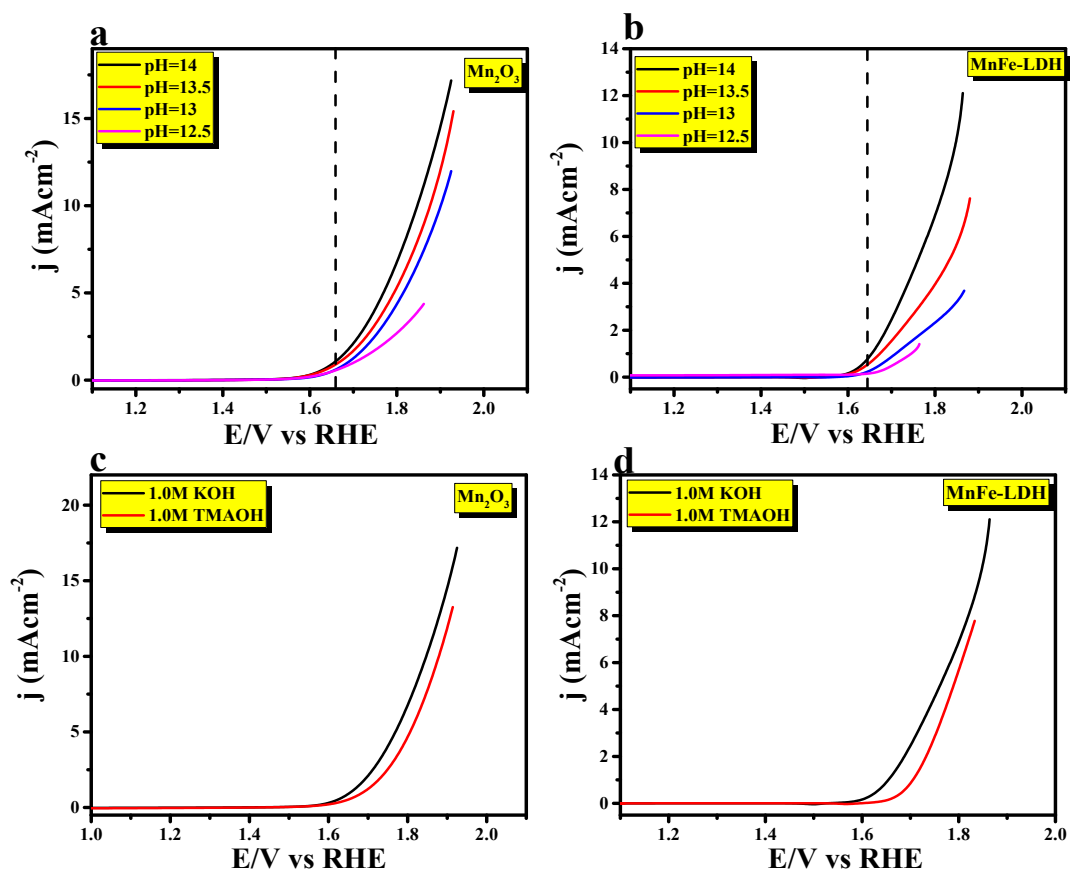

**Figure S13:** (a and b) LSV study of  $\text{Mn}_2\text{O}_3$  and MnFe-LDH at various pH of KOH (c and d) LSV study of  $\text{Mn}_2\text{O}_3$  and MnFe-LDH at 1.0 M KOH and 1.0 M TMAOH respectively.

## References:

- 1 H. N. Dhandapani, D. Mahendiran, A. Karmakar, P. Devi, S. Nagappan, R. Madhu, K. Bera, P. Murugan, B. R. Babu and S. Kundu, *J. Mater. Chem. A Mater.*, 2022, **10**, 17488–17500.
- 2 E. M. Manohar, H. N. Dhandapani, S. Roy, R. Pełka, M. Rams, P. Konieczny, S. Tothadi, S. Kundu, A. Dey and S. Das, *Inorg. Chem.*, 2024, **63**, 4883–4897.
- 3 R. Madhu, J. Muthukumar, P. Arunachalam, P. Gudlur and S. Kundu, *The Journal of Physical Chemistry C*, 2024, **128**, 12891–12902.
- 4 A. Mariappan, R. K. Dharman, T. H. Oh, S. Prabu and K. Y. Chiang, *Mater. Chem. Phys.*, 2023, **309**, 128321.
- 5 W. Zhang, M. Guo, D.-F. Chai, G. Dong, L. Bai, Z. Zhang, X. Zhang and D. Guo, *Int. J. Hydrogen Energy*, 2025, **99**, 485–493.
- 6 P. Aggarwal, D. Sarkar, P. K. Dwivedi, P. W. Menezes and K. Awasthi, *Int. J. Hydrogen Energy*, 2025, **171**, 151215.
- 7 W. Xia, X. Luan, W. Zhang and D. Wu, *Int. J. Hydrogen Energy*, 2023, **48**, 27631–27641.
- 8 S. Kumar, S. Raju, S. Marappa, M. S, V. D R, D. M and B. H, *ACS Appl. Energy Mater.*, 2024, **7**, 9872–9881.
- 9 M. Sun and J. Wang, *J. Mater. Chem. A Mater.*, 2023, **11**, 21420–21428.
- 10 N. K. Allam, *ECS Meeting Abstracts*, 2024, **MA2024-01**, 1857–1857.
- 11 Z. Pan, Z. Tang, M. Yaseen and Y. Zhan, *ACS Appl. Nano Mater.*, 2022, **5**, 16793–16803.
- 12 R. Srivastava, S. Bhardwaj, A. Kumar, A. N. Robinson, J. Sultana, S. R. Mishra, F. Perez and R. K. Gupta, *Int. J. Hydrogen Energy*, 2024, **49**, 971–983.
